# Supplementary material for: Immunity against conserved and non-conserved Spike epitopes after COVID-19 booster vaccination provides long-term protection against symptomatic Omicron infections
Source: Research Square preprint supplement (doi:10.21203/rs.3.rs-5678273/v1), 2025-01-08
Supplement: Supplementary file 1 [file 25e713fc157379c1344e6582.xlsx]

## Sheet: Figure 1a
Figure 1a
Wild-type	Alpha (B.1.1.7)	Beta (B.1.351; B.1.351.1)	Delta (variants)	Omicron (B.1.1.529; BA.1; BA.1.15)	Omicron (BA.2 subvariants)	Omicron (BA.2.12.1)	Omicron (BA.2.75)	Omicron (BA.4; BA.5)
15.0323	15.965	10.141	14.5748	6.84109	17.9322	26.6124	15.6277	9.6365
16.9682	21.8813	16.6442	21.8943	9.75089	18.5016	30.5913	12.5138	19.7098
36.0048	33.0504	29.2551	25.7313	25.6254	28.6604	38.5596	25.5267	26.1862
26.0812	23.8267	17.4953	23.3359	14.2609	31.348	33.1457	20.3588	22.6877
53.8427	46.9167	39.1042	40.4444	18.8617	29.5791	38.154	28.3793	33.7522
28.2573	26.3702	27.3662	22.9228	28.2712	28.3893	37.2381	23.6938	21.2415
17.6571	17.458	10.1368	17.9043	12.8847	17.6786	29.751	17.9899	18.2379
14.7665	20.4206	17.0524	21.9635	9.23614	14.8314	23.0888	14.1565	17.8044
35.7131	32.7268	26.1014	29.1456	25.236	28.3637	35.3513	29.7487	31.0438
23.9404	19.3567	17.529	17.1548	15.9092	19.6277	23.2615	22.642	20.1904
27.6031	22.0864	16.9179	23.8569	18.9124	19.9451	24.8974	23.8425	25.0359
31.1372	28.4723	22.9678	20.0288	22.0862	32.4343	36.5138	29.0881	28.7205
60.2877	50.6951	40.5523	44.7902	23.4891	19.0822	31.9076	20.935	20.4165
42.4546	36.2637	23.9621	30.5657	22.5183	27.2249	33.8073	23.0667	24.5745
40.0961	30.8095	25.4065	30.4071	17.9255	27.4562	35.3891	20.7702	23.0392
28.1093	25.1018	24.3012	25.547	15.7792	22.8313	23.1833	10.8716	29.3709
16.3032	21.8492	23.8662	25.4236	20.9319	19.4796	22.5942	19.1252	17.1144
14.4658	16.0284	9.97235	14.493	25.4974	21.1829	25.303	16.6326	18.2593
24.638	19.0203	22.5771	10.7456	20.3144	21.6218	19.791	26.648	28.4228
55.8797	51.2758	51.9636	48.991	51.0615	52.6705	59.5687	47.9309	49.8818
30.7404	25.6368	24.3735	18.7826	24.764	23.8673	36.1701	26.6348	23.972
38.745	35.5738	32.1969	21.4093	19.2858	22.6344	32.827	14.1512	20.6475
56.2763	49.763	48.4468	49.0504	47.9517	52.2095	58.6992	44.7621	49.9659
14.601	12.7884	15.7051	3.0724	10.8231	18.9642	23.6396	7.76662	10.5856
20.4976	18.8502	8.86957	17.2631	-9.21214	-1.09978	15.698	-5.18199	0.743408
46.0753	42.6306	33.8611	33.6312	13.3915	19.4267	38.0629	7.87917	16.1271
57.5552	45.9816	33.9704	44.769	23.9238	26.8979	32.8785	24.1078	34.6514
31.5214	24.5577	23.472	21.6411	23.5078	23.3043	31.3835	27.0274	17.6853
35.3279	28.704	26.6562	29.3738	12.7194	21.9644	30.52	12.278	16.3931
13.6552	12.2059	10.0461	13.3124	14.845	13.3305	18.5093	17.7528	11.6075
52.0888	44.8049	27.9616	26.7264	28.0632	26.3269	34.737	20.2583	22.1835
10.8218	15.7521	13.9193	18.9245	8.90809	16.2446	26.798	12.9064	25.7961
32.5398	25.6802	25.8054	19.4985	19.6511	21.2786	33.2454	23.876	21.7956
10.5171	13.7842	12.9876	13.6651	16.8427	21.3041	27.2851	20.4191	20.4122
34.4233	26.849	26.7209	17.461	25.3481	25.0349	34.7138	19.4303	18.5738
26.0338	23.4942	18.2047	12.4842	15.5118	11.0209	28.2002	12.203	1.92787
24.394	25.0732	28.7024	7.68077	16.8084	18.5794	14.5342	22.266	9.20614
2.23868	0.0146376	1.20853	2.05139	1.74847	5.09676	10.1701	-0.953143	7.22026
48.5449	44.6497	44.428	40.7518	48.1384	37.3246	45.4632	35.3052	35.3395
37.482	34.0856	39.8254	24.6641	40.7265	31.1519	43.0944	27.2994	27.3335
27.3963	19.6569	19.7061	23.4524	16.7971	15.33	15.2536	13.1413	24.2317
24.5371	22.5525	26.0181	13.8394	33.3793	24.8772	28.7904	23.5308	26.8747
29.267	25.314	19.3451	30.0112	16.1841	20.0308	26.9376	17.0011	28.6013
40.2063	33.1779	31.4044	26.435	22.8223	25.1115	35.9974	27.5124	20.9128
36.3477	30.1748	30.2377	33.1264	27.1047	28.7657	34.9184	21.2086	30.1992
19.2785	17.1299	13.7467	14.6354	19.9099	21.4859	24.5812	15.7818	20.3815
35.0732	29.8135	23.1598	26.5668	15.3598	22.4206	31.2074	15.6746	23.6625
26.6432	28.5223	21.7847	23.1658	9.26548	20.9277	29.7485	17.4915	24.0797
32.1125	37.0473	26.9357	29.1735	8.42001	20.0568	22.0286	22.0082	22.9843
25.2187	20.8499	16.707	17.3444	19.7872	18.9036	26.1648	22.0765	15.1402
59.4549	51.7733	48.6402	41.3873	28.4205	32.9255	43.5884	27.1279	33.8834
26.2925	25.9131	25.0256	21.7675	15.5438	20.5385	33.0203	21.7081	15.208
40.2124	32.3012	30.919	29.7571	16.5867	24.0428	34.1407	24.215	23.0649
46.0001	44.7001	29.8083	44.0317	22.2222	23.601	36.7948	21.5527	40.9809
60.379	53.8893	39.6994	43.3465	29.066	31.5857	42.7542	26.7594	28.7676
28.9294	21.5679	30.2227	26.3952	21.3753	24.1239	22.6059	17.6413	28.4332
21.3499	20.2551	33.0039	18.6287	20.6989	17.6178	9.63291	16.7558	11.2371
24.1739	19.0709	15.8541	10.2045	5.79559	6.00132	22.4479	14.6509	8.65028
30.4765	26.6641	26.1613	23.555	34.6642	29.8104	39.3715	27.0676	24.3321
36.4569	32.732	24.3742	31.3326	15.1784	17.3755	24.2341	18.0649	19.4231
33.5169	37.0853	28.1287	31.5348	7.84926	11.6701	26.4208	8.32267	24.6558
31.7975	31.0113	28.8599	23.6452	22.8357	25.8181	33.2858	17.7849	25.488
57.7493	45.3658	43.3556	50.713	21.1853	26.7138	38.6117	15.966	35.9831
22.2	23.8776	17.7708	22.5945	11.3245	18.2624	28.555	25.3325	20.6746
58.5154	50.8859	48.0249	49.2467	31.8184	30.3352	40.9705	32.0828	33.7693
21.9793	25.6608	23.7505	12.1148	17.1227	18.5144	29.7871	16.2548	14.0691
9.1058	17.6826	14.0519	14.5077	16.3063	15.7079	20.6733	12.4984	22.1364
19.6722	12.1789	16.2419	7.73228	19.5605	12.2698	22.221	20.8385	4.38094
31.2966	24.4724	26.2891	20.8568	25.5774	27.8166	38.0097	27.4803	24.5325
23.7527	23.2114	14.196	24.4888	20.5179	20.5911	32.6259	19.106	17.5911
28.6424	29.335	26.5437	26.0909	25.1504	33.765	28.7158	29.3677	34.1704
50.4375	43.3708	36.2332	40.4063	19.3444	26.1084	35.7216	20.2047	30.8377
64.1488	52.6343	44.8494	53.3149	21.5421	26.9729	39.5279	26.0292	33.6559
20.4888	18.4237	12.1737	16.624	10.8444	18.7154	27.9674	13.9019	14.6225
56.3967	50.1911	50.7179	49.2593	54.9368	54.5096	59.9888	52.7558	49.2315
69.9513	59.3426	45.3093	51.7661	10.703	18.1268	35.0446	20.3079	24.0404
26.3007	21.5958	13.2849	23.4467	13.6102	18.0885	28.9803	15.3088	22.4966
58.5355	50.7275	42.0747	41.7591	19.4031	28.9938	34.9303	22.9997	25.9159
24.0539	23.6969	22.235	25.3261	19.3178	16.8587	24.7883	25.165	30.1588
31.7006	23.7088	11.2677	20.8611	3.68592	13.2061	26.9449	15.4294	16.1271
23.6595	21.2596	22.4429	18.3299	23.7164	25.355	22.6708	21.4946	24.5631
20.294	17.946	16.8776	14.08	14.461	25.3858	27.9777	29.8063	29.0478
47.164	52.0437	49.3571	48.6683	48.7853	53.0147	56.449	45.5967	51.7674
29.1227	27.7447	25.1543	23.8362	28.4659	34.9145	33.6741	25.8738	23.8358
23.2084	18.177	13.6114	19.3911	21.4274	23.0586	27.6383	28.5428	23.3302
30.6419	22.0046	16.4508	11.3233	9.98826	11.9508	23.6696	11.1887	12.6394
29.8965	32.901	31.7224	28.6351	27.9351	29.3718	44.793	26.399	27.0797
48.7112	38.9525	32.8888	29.4189	13.9196	13.4103	29.9925	28.2199	21.7414
67.0232	61.6806	53.5997	54.6997	31.9144	34.4711	50.0797	33.4186	39.9611
55.4069	50.39	40.7313	49.013	27.6978	35.3516	44.6676	34.2159	39.9761
54.9542	49.518	22.6952	46.1542	24.2759	24.3602	35.4372	20.9671	21.218
9.91979	-0.590495	-1.96016	3.9398	-2.77539	-2.57666	-4.90679	-5.19998	0.448365
42.1089	37.2216	34.0818	35.345	12.3273	19.3247	29.2501	14.5384	17.8379
36.0585	42.5114	35.4929	33.8019	35.639	33.2246	34.1205	27.2148	29.8154
35.5995	32.5457	35.4153	30.0508	26.0255	33.5301	42.9526	27.1212	26.2568
32.4178	32.5065	32.1467	31.9548	28.3284	33.1837	41.4649	17.5364	32.4527
28.4876	25.0577	22.0491	23.3089	14.7384	21.4971	26.7696	16.0779	20.8215
32.3385	29.5032	30.7469	32.1183	34.7704	33.8769	32.426	29.1591	33.5724
63.1949	50.8193	48.389	52.0649	31.053	34.5748	45.7107	27.3959	36.9946
21.6442	27.5741	25.7819	24.9174	25.2454	26.8955	25.546	17.0562	30.1567
20.835	25.4624	28.3802	22.2439	25.9285	28.7164	32.8872	24.6879	24.4475
39.2972	37.0045	25.5242	32.1999	10.8577	22.092	32.735	14.4513	23.3366
38.4906	34.5168	33.9717	33.3083	13.5275	20.7506	27.0119	15.5419	22.0708
29.2767	22.7997	15.7695	17.1765	10.0363	15.7087	26.9724	11.3816	11.2773
35.8047	25.7391	16.5641	22.0152	2.89113	19.6437	27.1812	12.8582	18.1017
32.1091	31.7486	23.6186	32.3227	21.4408	19.9866	31.4729	26.4794	24.5781
32.8622	28.7283	20.7047	33.1015	4.66475	15.8347	25.3734	19.7505	24.832

## Sheet: Figure 1b
Figure 1b
Wild-type	Alpha (B.1.1.7)	Beta (B.1.351; B.1.351.1)	Delta (variants)	Omicron (B.1.1.529; BA.1; BA.1.15)	Omicron (BA.2 subvariants)	Omicron (BA.2.12.1)	Omicron (BA.2.75)	Omicron (BA.4; BA.5)
27.7656	21.7231	22.082	18.5371	-2.74555	-0.255042	15.282	-2.98955	-1.16996
48.2187	40.7618	37.4911	30.3348	-8.17462	7.18481	21.4433	-0.164652	22.2479
69.4938	56.9732	49.3454	55.4262	20.5911	20.0439	37.5426	13.5379	28.6961
53.1117	43.3038	40.2207	41.2174	4.80046	17.4541	29.5816	10.9112	23.2656
29.7362	21.2041	23.6504	21.4732	13.9115	13.263	26.152	4.94449	5.24649
79.5476	73.2151	53.1659	66.1963	3.35444	17.0269	35.3959	7.80029	32.3749
48.3622	41.8656	33.1976	32.64	15.2454	20.2306	25.3572	19.3194	24.0372
33.8868	32.5615	29.9299	27.4676	11.1693	16.1327	26.1957	19.5123	15.4048
24.3636	30.4721	27.6792	23.7495	29.2371	25.6881	36.4806	22.9528	19.3951
62.8734	47.8922	45.7191	43.2481	17.1367	14.2801	27.3517	8.68914	16.7906
61.0459	57.8485	49.2967	50.6101	26.632	32.7468	48.8911	31.8421	46.1251
64.8052	58.82	38.4625	55.9536	16.969	25.3261	29.7187	17.7319	34.6159
72.759	62.8939	54.265	53.7544	8.561	6.51228	27.0691	6.82376	16.8435
70.9931	62.3959	52.1057	54.2473	22.3874	25.6412	41.2301	18.7294	30.1755
32.3268	27.6597	28.918	27.1951	11.6524	19.2265	26.2698	18.1241	16.4918
86.1402	72.1064	70.8203	70.818	25.5718	29.4449	51.6989	33.3761	34.4629
41.4368	37.4993	34.2286	36.0585	26.3929	24.0867	35.0619	25.7231	29.678
69.7644	59.9369	38.009	48.4918	27.5746	17.5026	27.8962	22.5884	15.1883
-1.23575	3.2702	3.452	-2.53407	-12.8432	-6.38968	4.87772	-15.2334	-14.3269
97.4065	93.2155	87.9712	90.9835	55.0346	54.7236	69.6884	39.7227	65.1065
76.8486	63.9686	54.1577	56.2623	13.2991	20.9581	35.9353	13.7525	33.2115
33.5575	25.2661	19.8003	23.5224	11.9428	8.83566	19.612	12.7951	11.9471
69.7716	59.7537	49.5774	53.4103	6.50155	11.4905	36.635	2.81969	34.6998
76.9883	62.7054	50.4958	61.4455	22.0517	26.2678	38.2806	27.976	28.3257
83.4152	70.8385	57.7352	67.4083	23.966	25.2234	39.6976	17.8554	32.035
92.7816	83.5843	80.5622	82.472	20.8315	31.5791	50.6019	17.2455	53.3515
96.1529	92.7567	75.2472	84.6024	35.5198	37.078	53.2139	31.3825	42.3073
44.6128	43.0874	31.6048	31.0066	16.8101	9.89367	24.9299	7.57115	19.2648
58.7448	45.1189	42.168	42.5748	-9.05091	8.34374	25.695	3.94849	30.5549
46.4227	34.4673	32.3744	37.1162	3.45849	16.2218	23.7204	10.1592	23.0378
33.0018	26.2437	22.8149	21.4489	-0.965082	18.0263	21.408	9.76081	12.0716
25.9273	26.3247	25.5833	27.5105	17.7019	18.6083	24.7188	13.0901	25.4059
78.0786	62.4451	59.772	56.8242	11.378	20.9278	42.9441	10.0233	36.4462
41.3495	31.4508	34.3248	31.2427	18.1211	18.1625	33.1083	15.1284	21.3808
21.9967	16.5801	20.2813	20.6896	12.3147	16.5702	20.0865	22.4664	14.1388
18.881	18.359	18.1234	17.9489	8.38408	13.5672	20.9335	4.71286	8.63749
82.1504	69.4056	71.9445	67.7358	31.4599	29.4752	46.478	33.9196	46.5785
33.648	29.1835	32.5938	28.0676	11.4007	13.3462	22.4119	6.76354	11.7224
58.4191	43.6488	38.1116	37.7814	11.1625	13.5445	32.3496	15.0141	18.1242
53.5699	42.9035	30.3959	34.6201	8.79461	11.7705	29.9494	20.042	20.6456
69.2107	49.4249	36.5923	39.5111	-8.17768	0.990653	17.7953	-0.423107	1.64869
78.6493	68.5809	60.0716	65.3255	42.5782	46.706	57.071	38.8425	51.7908
27.9424	25.9305	23.4869	18.8307	5.76214	16.8472	21.689	6.61375	16.9249
68.7932	55.6616	46.9068	68.0064	20.0354	29.398	45.0108	20.1177	36.175
62.7235	45.6196	46.6002	47.8649	9.65876	18.3063	36.0021	4.24497	26.5663
38.1896	30.4078	28.7137	32.2906	11.9701	22.0154	24.6455	15.8335	26.2845
24.5703	21.7465	17.1694	25.4886	7.07532	20.2992	19.9493	11.6758	21.9632
59.3345	53.4095	51.1147	47.8147	8.95565	22.841	41.4491	14.0367	30.6737
78.1209	61.5615	64.621	62.7354	16.8147	18.8179	44.2203	24.1356	34.8138
82.0238	69.3444	50.9882	55.9411	37.4318	39.6239	54.5258	37.1933	42.7511
46.5016	41.6541	45.3891	46.0904	46.2203	49.0649	48.2878	43.6366	49.5756
39.3083	38.2819	37.5175	38.0231	21.572	24.1624	26.896	8.88791	20.8771
31.4661	23.4722	29.7483	27.7536	23.3831	14.159	23.3982	8.08845	14.554
36.7416	33.7804	38.9378	26.7643	24.4017	37.3357	36.4527	23.885	30.2625
34.509	30.7604	27.2338	28.4159	14.9525	14.6252	29.4383	12.2454	18.6061
32.765	28.5987	19.8012	24.7135	12.1083	11.1242	21.045	21.8194	11.5392
61.8306	48.2501	42.3312	40.4636	5.37203	13.2539	36.1104	10.4464	18.4303
6.66944	3.23426	3.55842	3.20573	-16.6672	-12.9981	-0.319237	-14.6343	-8.96804
31.8958	23.1133	30.9177	23.6865	17.6516	14.7523	24.1131	26.2743	17.1113
50.1549	48.4862	36.3846	38.153	-2.2461	4.11111	15.6481	7.70583	22.321
40.5898	35.5162	19.6886	29.0064	4.43983	3.82866	19.2927	-4.05967	7.63851
42.2299	38.6661	38.3259	31.3025	30.4097	27.9328	35.0182	16.3699	23.1142
93.4764	89.3178	79.8037	83.024	27.5678	37.9226	52.5157	24.8583	51.5351
97.6561	94.047	84.1038	95.8327	9.05677	37.1432	54.7707	16.8187	57.1805
56.1175	46.0599	32.2657	39.3345	-5.96401	6.36395	21.2209	3.67516	15.9349
5.93209	10.1713	10.0888	1.22018	2.45296	8.23173	15.0169	-1.55808	-4.75555
25.4461	21.6923	32.1306	18.0761	7.53223	12.9964	18.596	4.17402	18.6864
35.2972	29.4625	19.8759	20.2914	-13.5236	-3.31252	8.57482	-4.51829	-2.49542
61.0828	56.1386	48.9624	49.4452	27.4249	30.3425	38.6118	19.0414	39.9202
96.8092	93.5984	87.5349	93.0509	22.7004	38.8792	60.8572	43.5955	47.7549
80.3481	72.0583	53.4536	61.7124	-12.4723	9.27406	29.4768	5.64211	29.7625
56.4265	49.0246	49.3795	42.6081	24.1021	24.7966	41.4905	27.6919	27.4496
14.9789	14.249	20.7926	14.661	14.0783	21.7927	18.0497	14.4283	24.8193
31.3084	31.778	30.7896	29.0009	22.299	23.2376	33.6807	19.5834	21.0511
99.6297	99.23	98.7429	99.4905	72.769	80.4503	91.262	77.861	90.2951
91.9967	82.7856	60.7321	77.7208	24.6465	29.7158	41.2309	28.6647	32.0049
84.4254	72.6508	53.5971	65.1368	23.5079	22.6473	38.7996	32.3553	24.6969
5.15768	8.7965	6.98043	4.66035	-11.4506	-7.23881	0.198229	-17.9265	-7.26806
96.6327	94.6177	78.6471	90.204	37.0757	34.0493	49.9475	33.8084	34.436
27.6741	19.6052	18.5335	19.5804	14.8913	11.4693	21.205	5.02015	10.4726
47.5601	33.0741	31.7242	18.7063	-1.81414	6.37763	19.0381	16.0155	14.1881
-4.49867	-3.70585	5.27674	10.7384	19.8688	8.47615	13.0207	17.0825	1.5733
55.9368	41.5816	41.247	46.7353	11.759	9.81193	24.9395	1.16432	20.3314
52.1178	46.1861	33.6672	39.1662	-1.11739	7.82988	13.6402	1.59076	22.6919
22.6783	21.8276	20.9633	14.0418	9.0872	13.8533	18.3064	-1.02997	9.39874
58.9757	46.0674	27.882	40.4146	20.9608	22.2083	33.6926	27.9868	24.2727
40.0883	33.318	31.8632	27.8255	-19.1508	-8.6737	18.4369	-10.6997	1.91492
31.1411	23.442	25.7442	24.6339	14.5012	16.5172	24.883	15.5376	10.8455
51.6166	51.0548	38.5576	39.8671	5.10666	8.2726	26.804	0.222363	15.1256
89.3028	74.5245	75.8663	74.2147	28.373	30.5513	52.4281	22.7783	47.5302
81.2054	79.0068	67.6347	64.2614	6.20896	15.4501	35.6375	8.89143	24.5976
83.4696	69.1268	51.4536	66.1116	14.5715	24.2699	42.4458	13.9178	34.6762
23.689	27.3101	28.3587	22.055	23.2436	22.4799	37.3947	25.5787	22.2801
37.8317	30.8887	34.5946	31.0392	-11.0854	4.67931	22.712	0.231628	16.1164
48.5895	36.7852	35.9255	36.0236	30.8951	25.2083	30.9182	20.5608	22.4458
57.3075	49.0733	32.4829	40.9769	23.3831	24.618	28.2736	15.2319	17.8783
42.386	37.1608	26.8053	33.7874	13.1848	15.1122	19.5101	15.3769	27.258
32.6505	16.7381	18.3774	13.1667	-6.4834	-11.5571	4.44145	-10.4958	-7.42846
69.1113	53.3908	47.6433	53.2619	25.1432	25.4444	43.5142	23.6909	31.242
23.3986	20.8457	23.0868	19.1007	-6.02524	9.13535	19.8707	-2.05995	9.28313
13.2229	14.6675	19.0964	20.7784	14.1303	17.5685	27.6298	15.8164	17.5288
73.0654	55.5585	55.5536	55.3357	-5.65781	13.7988	32.0821	9.34387	22.0973
77.7795	65.2059	62.0739	61.1219	2.01295	11.433	36.9901	2.72395	27.3731
60.8653	47.825	41.8955	43.0312	-3.4464	8.2953	30.517	7.84138	17.1447
51.2903	38.1499	39.6071	36.6415	13.9704	16.9788	28.3062	19.1433	21.8962
94.485	85.5112	85.8145	88.7967	40.2329	33.9085	64.2813	32.6333	56.8516
97.3392	95.2242	84.2152	96.6158	24.0976	29.8642	53.6764	14.1633	53.1374

## Sheet: Figure 1c
Figure 1c
Wild-type	Alpha (B.1.1.7)	Beta (B.1.351; B.1.351.1)	Delta (variants)	Omicron (B.1.1.529; BA.1; BA.1.15)	Omicron (BA.2 subvariants)	Omicron (BA.2.12.1)	Omicron (BA.2.75)	Omicron (BA.4; BA.5)
71.108	56.1414	60.6793	56.2432	18.7308	11.5127	25.0865	17.7484	24.8264
24.4685	15.6179	17.5844	14.1641	16.642	5.58511	4.47059	13.2092	9.96823
33.7596	26.8865	8.75393	22.7605	1.94916	-11.1579	-10.6633	-2.93837	-10.9979
1.68438	-2.10361	4.58668	-4.79873	-17.0065	-31.6031	-17.8638	-23.3484	-23.8576
-5.62393	-6.15496	-1.61315	-10.1096	-27.0363	-22.3943	-16.7107	-28.544	-11.5043
-29.493	-23.1	-23.9142	-25.4569	-41.1144	-34.7789	-32.3604	-38.9272	-35.5684
79.7494	75.7575	77.8344	73.0792	42.1499	37.045	39.9374	21.7328	46.8685
62.0821	43.5481	37.1054	34.2988	4.06294	6.12667	12.8464	-0.403983	15.4071
-2.15559	-7.4607	-6.30103	-5.62319	-13.2933	-19.5281	-15.7393	-16.9536	-19.0967
45.8312	40.397	32.0484	36.2555	-9.40766	-8.1372	13.3735	-19.8223	14.5094
49.3852	40.6191	33.5779	37.5886	3.13938	6.3227	13.3831	4.13352	3.28974
52.278	42.3662	34.7674	47.3795	1.87982	-7.21082	3.18384	-11.2327	3.31449
32.4939	32.8892	40.0098	37.6817	-2.6576	12.4969	18.6942	-3.68949	32.9351
53.6983	56.493	51.2851	54.0367	13.0015	9.85311	19.4065	8.31579	17.7328
4.51665	12.2779	6.19831	0.599514	-1.11541	-17.5625	-10.4592	-13.199	-3.77443
30.6355	20.0171	17.8668	17.0278	-24.8301	-14.4876	2.51173	-6.92312	1.18394
30.1195	12.6181	8.5082	11.6926	-17.4734	-3.25783	1.12622	-8.96597	5.9234
18.5361	10.2153	12.8425	6.95588	-26.4625	-3.15662	-3.89499	-6.87181	-6.18767
1.28936	7.30441	3.00624	16.7649	-2.61253	-3.01353	4.92788	-13.5579	-3.01694
22.1989	11.1693	7.80837	7.83316	-39.6835	-31.7427	-16.6245	-37.9076	-13.4356
10.6091	5.81398	9.9513	12.4601	-6.64287	-5.70484	-3.06182	-11.5064	-2.59115
-16.7483	-18.9936	-11.9156	-0.719657	-6.97103	-6.06419	-12.7405	8.31522	-6.50868
-37.3953	-31.404	-30.3234	-31.1015	-39.5676	-38.6423	-37.7657	-40.0492	-41.3285
67.5494	56.6171	56.2395	64.6634	20.6368	10.511	22.8385	26.153	35.9928
13.1504	10.3333	23.7242	10.8046	20.6128	14.446	6.71388	11.9455	10.979
12.3438	1.0182	4.25049	4.15024	-2.22895	-5.88226	-5.71332	7.13496	1.99701
11.9386	10.9916	15.375	10.6572	-3.33276	-6.854	4.66406	-10.5699	-5.95527
22.0485	18.3458	6.92394	12.9791	-14.7132	-11.5337	-1.43416	-6.98541	2.96036
17.7838	14.5999	13.5645	11.8436	-7.91891	-4.51033	-0.938461	-1.36677	6.87249
16.0811	8.99821	13.6043	8.16084	-0.933566	-0.0675647	7.64267	-12.8083	-6.36102
17.1219	4.62003	8.63068	12.7847	-36.2408	-25.3362	-16.9417	-20.6814	-20.5348
67.8275	52.8288	46.1522	46.401	33.6701	30.4614	30.273	25.9361	25.9947
-4.59738	0.25029	-2.31845	-0.667718	-13.889	-4.43142	-11.5564	-17.2623	-4.8707
58.2761	41.8773	33.9192	54.3413	3.19269	8.09386	17.7257	-0.301448	15.7629
45.1243	46.3661	26.445	48.7353	-21.9936	-8.00798	0.682134	-11.63	13.8011
36.6896	22.1254	28.3955	35.3807	-5.85305	7.28537	7.80194	-7.958	24.6384
13.7956	5.33468	0.0113148	24.6099	-4.83827	3.43595	10.1114	-6.43257	17.0783
22.3316	21.7318	15.9609	23.4372	5.32685	15.2024	9.7792	12.629	14.7429
10.7896	8.75974	6.6867	7.06292	-39.1827	-14.4836	-4.01415	-21.2685	-4.6658
40.6389	27.4759	24.7957	38.0713	-23.9119	-12.334	1.12589	-3.16376	7.48022
54.6275	49.6875	31.2822	32.4887	20.6347	24.2939	39.2722	24.052	18.5194
21.9646	19.1016	19.371	32.251	12.841	24.1876	19.4974	20.1059	22.7009
10.0414	12.9679	18.1724	8.01186	5.38792	4.13157	-0.0415198	-8.1132	-7.72412
-8.74015	-9.70564	-1.65614	1.31859	0.5608	-10.9524	-12.5992	-19.424	-6.35873
0.393886	3.60558	8.70001	-6.36204	-2.70301	8.57002	1.53428	2.67641	0.0632742
29.0837	24.7358	19.451	18.0046	-4.66443	-1.25535	0.775968	3.53757	3.6557
-0.564206	0.946888	4.07397	1.8491	-0.407251	-7.79543	-1.76912	-3.42919	-5.05634
6.12178	0.0763322	-1.98345	1.54767	2.84284	-9.80344	-8.70351	4.32789	-12.5405
29.7182	11.2028	15.3955	11.29	-3.04799	-6.80291	14.0818	-11.5618	-4.55404
8.66805	11.7116	13.2229	10.1232	-8.61784	-2.77083	0.0309943	-2.5642	0.264631
-52.7854	-48.5391	-45.0817	-38.1816	-45.0878	-45.9236	-43.9077	-41.7622	-42.8514
-1.92891	4.559	2.65355	1.98205	13.6933	5.14964	3.46029	1.24471	4.18712
22.661	15.5909	14.8001	13.491	0.550079	-9.76269	-6.78901	-15.5259	-6.27435
-14.1043	-21.5868	1.10943	-20.3452	-4.57063	-8.84862	-12.6816	4.72169	-23.8695
0.66687	3.95917	9.59736	7.26358	-2.434	1.16113	6.13697	5.08263	17.3575
21.2255	26.9183	6.16199	11.7578	-23.6214	-20.0128	-6.9578	-9.93552	-6.11219
19.2399	15.2611	-13.3153	10.3776	-16.2591	-13.7892	9.65984	-20.8154	-3.59863
40.6313	39.7491	22.6084	45.7492	11.1734	19.3248	7.27088	3.08095	25.9657
11.7534	12.002	12.1646	7.74746	-4.25448	-1.87763	-4.35334	-10.6977	-1.2179
36.3021	30.1619	29.8908	22.4218	-6.61743	-10.8632	2.83494	-11.2412	-2.57962
37.4762	25.3106	23.977	22.7125	14.5382	13.9711	14.8093	10.4068	5.51961
61.6789	58.3065	50.9438	59.3788	4.73213	12.1045	19.2299	7.07341	26.0471
39.9068	48.6812	40.7481	45.1197	-12.1285	10.4294	16.159	0.852778	21.1974
10.1268	3.78208	11.1472	4.60065	0.327956	0.964181	-2.28526	-7.20834	-4.18284
-2.39786	-4.82602	-15.7592	-9.91214	-37.7824	-23.9713	-19.7496	-28.4076	-17.8344
-16.0472	-15.4895	-13.6617	-10.8946	-14.6698	-10.2827	-14.7703	-17.8128	-18.8247
16.3403	4.00968	18.0786	3.56843	-8.77403	-2.71145	-2.07729	-8.32442	-3.45
15.625	17.2836	3.63403	12.5592	-33.0841	-15.5823	-13.6462	-25.3568	-6.87636
0.0117452	7.30567	4.50043	8.14416	-3.27847	-4.57904	-4.32897	-7.89691	-3.48138
37.3301	32.9272	34.7664	24.9564	6.90695	9.75133	5.98583	-0.0646627	22.3291
70.9873	69.895	72.1992	73.3996	47.6186	46.6853	62.5462	48.4933	56.1247
46.3717	50.2276	51.3017	52.6446	3.35599	12.7708	25.1356	23.3908	16.9172
27.848	30.1513	15.8828	24.4059	3.10434	2.74296	1.70306	2.63555	-1.65101
63.9366	54.2271	41.4234	48.5128	12.6635	3.93193	10.8323	18.4534	10.0744
-51.2391	-41.3946	-43.7375	-44.599	-66.3874	-61.7484	-59.7906	-70.6823	-56.4995
26.6814	35.2751	33.3379	38.4379	26.3727	15.9225	14.9029	13.5005	10.3956
1.37341	-1.9906	5.2486	-3.86631	1.28112	-6.61918	-7.77537	-10.2887	-12.0239
21.8126	21.3308	11.3789	19.9533	-31.8754	-19.7197	-5.45354	-17.3576	3.8466
23.5061	9.37718	9.48924	-6.61984	-21.1319	-10.4811	-5.75018	-9.14942	-15.9707
24.7259	25.3158	38.1119	21.747	20.4162	11.5905	14.5456	12.2625	11.3225
-28.1582	-24.9655	-17.1662	-7.59151	-3.84755	-16.8789	-9.6501	-4.41214	-22.9898
35.6428	23.6356	24.3694	32.6552	-2.70194	-15.5739	-3.03816	-28.642	-8.71647
4.95383	-5.85757	-15.6899	-9.5021	-49.9027	-45.1849	-42.8088	-44.006	-29.0755
-6.44439	-5.91707	-4.19092	-9.79435	-19.3787	-21.0613	-15.3678	-26.9037	-14.437
35.7673	27.8904	14.2706	21.0235	-0.466655	-0.850294	6.05436	-0.555969	0.942562
9.44639	11.3134	15.4124	16.5022	-29.1391	-20.6245	-5.23271	-21.8883	-10.7244
1.24461	-9.45899	-5.97824	-4.0012	-13.434	-12.8546	-19.9101	-10.8614	-16.2342
2.90547	12.1023	5.66875	10.4482	-8.8129	-5.13767	-3.18851	-27.9975	-6.61581
22.2797	12.8439	22.2666	19.515	-3.54147	-3.9198	2.34842	-10.6403	7.56909
25.7985	28.6168	26.9033	15.2484	-21.4888	-19.9015	-9.03008	-25.3244	-15.3785
28.5154	19.6087	28.7585	19.9574	-9.70439	-0.0903156	7.00856	-7.04937	13.4582
13.7692	27.9006	30.3188	18.1152	26.019	25.0566	42.3015	30.7787	21.8317
-4.2772	-6.33284	0.512856	-4.30579	-23.4127	-14.6454	-6.53813	-14.3067	-1.72145
12.531	-5.72619	0.43258	2.22173	-4.74388	-8.01631	-3.20225	-6.65391	-7.36963
21.708	16.5276	-2.93237	10.9261	-2.64238	-8.91205	-14.6791	-11.8893	-8.37847
9.96818	4.65424	-5.3414	1.8326	-15.1436	-18.0715	-21.9549	-2.1595	-5.19471
4.16296	-8.3196	-3.67165	-10.1422	-21.2218	-33.0542	-22.3282	-26.5737	-28.2499
36.7728	23.8876	16.8963	21.1436	-9.62724	-8.43248	11.0882	-5.46818	-2.33042
-39.7964	-29.9736	-25.3022	-32.9642	-37.0782	-25.4394	-25.84	-29.4558	-27.7115
-6.66526	-13.3251	-4.98929	-10.2564	-11.1672	-5.10278	-7.49626	-2.62787	-5.33734
-7.61207	-10.7949	-9.2838	-1.4655	-11.7982	-11.1479	-5.25744	-8.87151	-6.91867
33.7682	18.554	30.0293	23.1358	-16.5155	-8.29328	-0.652919	-5.10741	-1.23931
39.2889	30.6891	28.1022	27.8136	-11.5145	-9.31762	9.97818	-12.818	5.30225
31.5886	25.0253	26.126	25.8547	-13.4827	-7.41341	3.54459	-3.54024	5.86738
15.4856	12.4109	23.043	14.6263	11.0793	-2.66482	1.12503	6.28512	3.79447
62.3759	53.7626	62.1959	56.474	18.7922	13.9219	32.8084	6.15391	32.2735
64.477	66.496	63.5106	63.5143	19.4328	14.0294	28.303	-5.58723	28.3054

## Sheet: Figure 1d
Figure 1d
Wild-type		Alpha (B.1.1.7)		Beta (B.1.351; B.1.351.1)		Delta (variants)		Omicron (B.1.1.529; BA.1; BA.1.15)		Omicron (BA.2 subvariants)		Omicron (BA.2.12.1)		Omicron (BA.2.75)		Omicron (BA.4; BA.5)
Δ TP2-TP1	TP1	Δ TP2-TP1	TP1	Δ TP2-TP1	TP1	Δ TP2-TP1	TP1	Δ TP2-TP1	TP1	Δ TP2-TP1	TP1	Δ TP2-TP1	TP1	Δ TP2-TP1	TP1	Δ TP2-TP1	TP1
71.108	15.0323	56.1414	15.965	60.6793	10.141	56.2432	14.5748	18.7308	6.84109	11.5127	17.9322	25.0865	26.6124	17.7484	15.6277	24.8264	9.6365
24.4685	16.9682	15.6179	21.8813	17.5844	16.6442	14.1641	21.8943	16.642	9.75089	5.58511	18.5016	4.47059	30.5913	13.2092	12.5138	9.96823	19.7098
33.7596	36.0048	26.8865	33.0504	8.75393	29.2551	22.7605	25.7313	1.94916	25.6254	-11.1579	28.6604	-10.6633	38.5596	-2.93837	25.5267	-10.9979	26.1862
1.68438	26.0812	-2.10361	23.8267	4.58668	17.4953	-4.79873	23.3359	-17.0065	14.2609	-31.6031	31.348	-17.8638	33.1457	-23.3484	20.3588	-23.8576	22.6877
-5.62393	53.8427	-6.15496	46.9167	-1.61315	39.1042	-10.1096	40.4444	-27.0363	18.8617	-22.3943	29.5791	-16.7107	38.154	-28.544	28.3793	-11.5043	33.7522
-29.493	28.2573	-23.1	26.3702	-23.9142	27.3662	-25.4569	22.9228	-41.1144	28.2712	-34.7789	28.3893	-32.3604	37.2381	-38.9272	23.6938	-35.5684	21.2415
79.7494	17.6571	75.7575	17.458	77.8344	10.1368	73.0792	17.9043	42.1499	12.8847	37.045	17.6786	39.9374	29.751	21.7328	17.9899	46.8685	18.2379
62.0821	14.7665	43.5481	20.4206	37.1054	17.0524	34.2988	21.9635	4.06294	9.23614	6.12667	14.8314	12.8464	23.0888	-0.403983	14.1565	15.4071	17.8044
-2.15559	35.7131	-7.4607	32.7268	-6.30103	26.1014	-5.62319	29.1456	-13.2933	25.236	-19.5281	28.3637	-15.7393	35.3513	-16.9536	29.7487	-19.0967	31.0438
45.8312	23.9404	40.397	19.3567	32.0484	17.529	36.2555	17.1548	-9.40766	15.9092	-8.1372	19.6277	13.3735	23.2615	-19.8223	22.642	14.5094	20.1904
49.3852	27.6031	40.6191	22.0864	33.5779	16.9179	37.5886	23.8569	3.13938	18.9124	6.3227	19.9451	13.3831	24.8974	4.13352	23.8425	3.28974	25.0359
52.278	31.1372	42.3662	28.4723	34.7674	22.9678	47.3795	20.0288	1.87982	22.0862	-7.21082	32.4343	3.18384	36.5138	-11.2327	29.0881	3.31449	28.7205
32.4939	60.2877	32.8892	50.6951	40.0098	40.5523	37.6817	44.7902	-2.6576	23.4891	12.4969	19.0822	18.6942	31.9076	-3.68949	20.935	32.9351	20.4165
53.6983	42.4546	56.493	36.2637	51.2851	23.9621	54.0367	30.5657	13.0015	22.5183	9.85311	27.2249	19.4065	33.8073	8.31579	23.0667	17.7328	24.5745
4.51665	40.0961	12.2779	30.8095	6.19831	25.4065	0.599514	30.4071	-1.11541	17.9255	-17.5625	27.4562	-10.4592	35.3891	-13.199	20.7702	-3.77443	23.0392
30.6355	28.1093	20.0171	25.1018	17.8668	24.3012	17.0278	25.547	-24.8301	15.7792	-14.4876	22.8313	2.51173	23.1833	-6.92312	10.8716	1.18394	29.3709
30.1195	16.3032	12.6181	21.8492	8.5082	23.8662	11.6926	25.4236	-17.4734	20.9319	-3.25783	19.4796	1.12622	22.5942	-8.96597	19.1252	5.9234	17.1144
18.5361	14.4658	10.2153	16.0284	12.8425	9.97235	6.95588	14.493	-26.4625	25.4974	-3.15662	21.1829	-3.89499	25.303	-6.87181	16.6326	-6.18767	18.2593
1.28936	24.638	7.30441	19.0203	3.00624	22.5771	16.7649	10.7456	-2.61253	20.3144	-3.01353	21.6218	4.92788	19.791	-13.5579	26.648	-3.01694	28.4228
22.1989	55.8797	11.1693	51.2758	7.80837	51.9636	7.83316	48.991	-39.6835	51.0615	-31.7427	52.6705	-16.6245	59.5687	-37.9076	47.9309	-13.4356	49.8818
10.6091	30.7404	5.81398	25.6368	9.9513	24.3735	12.4601	18.7826	-6.64287	24.764	-5.70484	23.8673	-3.06182	36.1701	-11.5064	26.6348	-2.59115	23.972
-16.7483	38.745	-18.9936	35.5738	-11.9156	32.1969	-0.719657	21.4093	-6.97103	19.2858	-6.06419	22.6344	-12.7405	32.827	8.31522	14.1512	-6.50868	20.6475
-37.3953	56.2763	-31.404	49.763	-30.3234	48.4468	-31.1015	49.0504	-39.5676	47.9517	-38.6423	52.2095	-37.7657	58.6992	-40.0492	44.7621	-41.3285	49.9659
67.5494	14.601	56.6171	12.7884	56.2395	15.7051	64.6634	3.0724	20.6368	10.8231	10.511	18.9642	22.8385	23.6396	26.153	7.76662	35.9928	10.5856
13.1504	20.4976	10.3333	18.8502	23.7242	8.86957	10.8046	17.2631	20.6128	-9.21214	14.446	-1.09978	6.71388	15.698	11.9455	-5.18199	10.979	0.743408
12.3438	46.0753	1.0182	42.6306	4.25049	33.8611	4.15024	33.6312	-2.22895	13.3915	-5.88226	19.4267	-5.71332	38.0629	7.13496	7.87917	1.99701	16.1271
11.9386	57.5552	10.9916	45.9816	15.375	33.9704	10.6572	44.769	-3.33276	23.9238	-6.854	26.8979	4.66406	32.8785	-10.5699	24.1078	-5.95527	34.6514
22.0485	31.5214	18.3458	24.5577	6.92394	23.472	12.9791	21.6411	-14.7132	23.5078	-11.5337	23.3043	-1.43416	31.3835	-6.98541	27.0274	2.96036	17.6853
17.7838	35.3279	14.5999	28.704	13.5645	26.6562	11.8436	29.3738	-7.91891	12.7194	-4.51033	21.9644	-0.938461	30.52	-1.36677	12.278	6.87249	16.3931
16.0811	13.6552	8.99821	12.2059	13.6043	10.0461	8.16084	13.3124	-0.933566	14.845	-0.0675647	13.3305	7.64267	18.5093	-12.8083	17.7528	-6.36102	11.6075
17.1219	52.0888	4.62003	44.8049	8.63068	27.9616	12.7847	26.7264	-36.2408	28.0632	-25.3362	26.3269	-16.9417	34.737	-20.6814	20.2583	-20.5348	22.1835
67.8275	10.8218	52.8288	15.7521	46.1522	13.9193	46.401	18.9245	33.6701	8.90809	30.4614	16.2446	30.273	26.798	25.9361	12.9064	25.9947	25.7961
-4.59738	32.5398	0.25029	25.6802	-2.31845	25.8054	-0.667718	19.4985	-13.889	19.6511	-4.43142	21.2786	-11.5564	33.2454	-17.2623	23.876	-4.8707	21.7956
58.2761	10.5171	41.8773	13.7842	33.9192	12.9876	54.3413	13.6651	3.19269	16.8427	8.09386	21.3041	17.7257	27.2851	-0.301448	20.4191	15.7629	20.4122
45.1243	34.4233	46.3661	26.849	26.445	26.7209	48.7353	17.461	-21.9936	25.3481	-8.00798	25.0349	0.682134	34.7138	-11.63	19.4303	13.8011	18.5738
36.6896	26.0338	22.1254	23.4942	28.3955	18.2047	35.3807	12.4842	-5.85305	15.5118	7.28537	11.0209	7.80194	28.2002	-7.958	12.203	24.6384	1.92787
13.7956	24.394	5.33468	25.0732	0.0113148	28.7024	24.6099	7.68077	-4.83827	16.8084	3.43595	18.5794	10.1114	14.5342	-6.43257	22.266	17.0783	9.20614
22.3316	2.23868	21.7318	0.0146376	15.9609	1.20853	23.4372	2.05139	5.32685	1.74847	15.2024	5.09676	9.7792	10.1701	12.629	-0.953143	14.7429	7.22026
10.7896	48.5449	8.75974	44.6497	6.6867	44.428	7.06292	40.7518	-39.1827	48.1384	-14.4836	37.3246	-4.01415	45.4632	-21.2685	35.3052	-4.6658	35.3395
40.6389	37.482	27.4759	34.0856	24.7957	39.8254	38.0713	24.6641	-23.9119	40.7265	-12.334	31.1519	1.12589	43.0944	-3.16376	27.2994	7.48022	27.3335
54.6275	27.3963	49.6875	19.6569	31.2822	19.7061	32.4887	23.4524	20.6347	16.7971	24.2939	15.33	39.2722	15.2536	24.052	13.1413	18.5194	24.2317
21.9646	24.5371	19.1016	22.5525	19.371	26.0181	32.251	13.8394	12.841	33.3793	24.1876	24.8772	19.4974	28.7904	20.1059	23.5308	22.7009	26.8747
10.0414	29.267	12.9679	25.314	18.1724	19.3451	8.01186	30.0112	5.38792	16.1841	4.13157	20.0308	-0.0415198	26.9376	-8.1132	17.0011	-7.72412	28.6013
-8.74015	40.2063	-9.70564	33.1779	-1.65614	31.4044	1.31859	26.435	0.5608	22.8223	-10.9524	25.1115	-12.5992	35.9974	-19.424	27.5124	-6.35873	20.9128
0.393886	36.3477	3.60558	30.1748	8.70001	30.2377	-6.36204	33.1264	-2.70301	27.1047	8.57002	28.7657	1.53428	34.9184	2.67641	21.2086	0.0632742	30.1992
29.0837	19.2785	24.7358	17.1299	19.451	13.7467	18.0046	14.6354	-4.66443	19.9099	-1.25535	21.4859	0.775968	24.5812	3.53757	15.7818	3.6557	20.3815
-0.564206	35.0732	0.946888	29.8135	4.07397	23.1598	1.8491	26.5668	-0.407251	15.3598	-7.79543	22.4206	-1.76912	31.2074	-3.42919	15.6746	-5.05634	23.6625
6.12178	26.6432	0.0763322	28.5223	-1.98345	21.7847	1.54767	23.1658	2.84284	9.26548	-9.80344	20.9277	-8.70351	29.7485	4.32789	17.4915	-12.5405	24.0797
29.7182	32.1125	11.2028	37.0473	15.3955	26.9357	11.29	29.1735	-3.04799	8.42001	-6.80291	20.0568	14.0818	22.0286	-11.5618	22.0082	-4.55404	22.9843
8.66805	25.2187	11.7116	20.8499	13.2229	16.707	10.1232	17.3444	-8.61784	19.7872	-2.77083	18.9036	0.0309943	26.1648	-2.5642	22.0765	0.264631	15.1402
-52.7854	59.4549	-48.5391	51.7733	-45.0817	48.6402	-38.1816	41.3873	-45.0878	28.4205	-45.9236	32.9255	-43.9077	43.5884	-41.7622	27.1279	-42.8514	33.8834
-1.92891	26.2925	4.559	25.9131	2.65355	25.0256	1.98205	21.7675	13.6933	15.5438	5.14964	20.5385	3.46029	33.0203	1.24471	21.7081	4.18712	15.208
22.661	40.2124	15.5909	32.3012	14.8001	30.919	13.491	29.7571	0.550079	16.5867	-9.76269	24.0428	-6.78901	34.1407	-15.5259	24.215	-6.27435	23.0649
-14.1043	46.0001	-21.5868	44.7001	1.10943	29.8083	-20.3452	44.0317	-4.57063	22.2222	-8.84862	23.601	-12.6816	36.7948	4.72169	21.5527	-23.8695	40.9809
0.66687	60.379	3.95917	53.8893	9.59736	39.6994	7.26358	43.3465	-2.434	29.066	1.16113	31.5857	6.13697	42.7542	5.08263	26.7594	17.3575	28.7676
21.2255	28.9294	26.9183	21.5679	6.16199	30.2227	11.7578	26.3952	-23.6214	21.3753	-20.0128	24.1239	-6.9578	22.6059	-9.93552	17.6413	-6.11219	28.4332
19.2399	21.3499	15.2611	20.2551	-13.3153	33.0039	10.3776	18.6287	-16.2591	20.6989	-13.7892	17.6178	9.65984	9.63291	-20.8154	16.7558	-3.59863	11.2371
40.6313	24.1739	39.7491	19.0709	22.6084	15.8541	45.7492	10.2045	11.1734	5.79559	19.3248	6.00132	7.27088	22.4479	3.08095	14.6509	25.9657	8.65028
11.7534	30.4765	12.002	26.6641	12.1646	26.1613	7.74746	23.555	-4.25448	34.6642	-1.87763	29.8104	-4.35334	39.3715	-10.6977	27.0676	-1.2179	24.3321
36.3021	36.4569	30.1619	32.732	29.8908	24.3742	22.4218	31.3326	-6.61743	15.1784	-10.8632	17.3755	2.83494	24.2341	-11.2412	18.0649	-2.57962	19.4231
37.4762	33.5169	25.3106	37.0853	23.977	28.1287	22.7125	31.5348	14.5382	7.84926	13.9711	11.6701	14.8093	26.4208	10.4068	8.32267	5.51961	24.6558
61.6789	31.7975	58.3065	31.0113	50.9438	28.8599	59.3788	23.6452	4.73213	22.8357	12.1045	25.8181	19.2299	33.2858	7.07341	17.7849	26.0471	25.488
39.9068	57.7493	48.6812	45.3658	40.7481	43.3556	45.1197	50.713	-12.1285	21.1853	10.4294	26.7138	16.159	38.6117	0.852778	15.966	21.1974	35.9831
10.1268	22.2	3.78208	23.8776	11.1472	17.7708	4.60065	22.5945	0.327956	11.3245	0.964181	18.2624	-2.28526	28.555	-7.20834	25.3325	-4.18284	20.6746
-2.39786	58.5154	-4.82602	50.8859	-15.7592	48.0249	-9.91214	49.2467	-37.7824	31.8184	-23.9713	30.3352	-19.7496	40.9705	-28.4076	32.0828	-17.8344	33.7693
-16.0472	21.9793	-15.4895	25.6608	-13.6617	23.7505	-10.8946	12.1148	-14.6698	17.1227	-10.2827	18.5144	-14.7703	29.7871	-17.8128	16.2548	-18.8247	14.0691
16.3403	9.1058	4.00968	17.6826	18.0786	14.0519	3.56843	14.5077	-8.77403	16.3063	-2.71145	15.7079	-2.07729	20.6733	-8.32442	12.4984	-3.45	22.1364
15.625	19.6722	17.2836	12.1789	3.63403	16.2419	12.5592	7.73228	-33.0841	19.5605	-15.5823	12.2698	-13.6462	22.221	-25.3568	20.8385	-6.87636	4.38094
0.0117452	31.2966	7.30567	24.4724	4.50043	26.2891	8.14416	20.8568	-3.27847	25.5774	-4.57904	27.8166	-4.32897	38.0097	-7.89691	27.4803	-3.48138	24.5325
37.3301	23.7527	32.9272	23.2114	34.7664	14.196	24.9564	24.4888	6.90695	20.5179	9.75133	20.5911	5.98583	32.6259	-0.0646627	19.106	22.3291	17.5911
70.9873	28.6424	69.895	29.335	72.1992	26.5437	73.3996	26.0909	47.6186	25.1504	46.6853	33.765	62.5462	28.7158	48.4933	29.3677	56.1247	34.1704
46.3717	50.4375	50.2276	43.3708	51.3017	36.2332	52.6446	40.4063	3.35599	19.3444	12.7708	26.1084	25.1356	35.7216	23.3908	20.2047	16.9172	30.8377
27.848	64.1488	30.1513	52.6343	15.8828	44.8494	24.4059	53.3149	3.10434	21.5421	2.74296	26.9729	1.70306	39.5279	2.63555	26.0292	-1.65101	33.6559
63.9366	20.4888	54.2271	18.4237	41.4234	12.1737	48.5128	16.624	12.6635	10.8444	3.93193	18.7154	10.8323	27.9674	18.4534	13.9019	10.0744	14.6225
-51.2391	56.3967	-41.3946	50.1911	-43.7375	50.7179	-44.599	49.2593	-66.3874	54.9368	-61.7484	54.5096	-59.7906	59.9888	-70.6823	52.7558	-56.4995	49.2315
26.6814	69.9513	35.2751	59.3426	33.3379	45.3093	38.4379	51.7661	26.3727	10.703	15.9225	18.1268	14.9029	35.0446	13.5005	20.3079	10.3956	24.0404
1.37341	26.3007	-1.9906	21.5958	5.2486	13.2849	-3.86631	23.4467	1.28112	13.6102	-6.61918	18.0885	-7.77537	28.9803	-10.2887	15.3088	-12.0239	22.4966
21.8126	58.5355	21.3308	50.7275	11.3789	42.0747	19.9533	41.7591	-31.8754	19.4031	-19.7197	28.9938	-5.45354	34.9303	-17.3576	22.9997	3.8466	25.9159
23.5061	24.0539	9.37718	23.6969	9.48924	22.235	-6.61984	25.3261	-21.1319	19.3178	-10.4811	16.8587	-5.75018	24.7883	-9.14942	25.165	-15.9707	30.1588
24.7259	31.7006	25.3158	23.7088	38.1119	11.2677	21.747	20.8611	20.4162	3.68592	11.5905	13.2061	14.5456	26.9449	12.2625	15.4294	11.3225	16.1271
-28.1582	23.6595	-24.9655	21.2596	-17.1662	22.4429	-7.59151	18.3299	-3.84755	23.7164	-16.8789	25.355	-9.6501	22.6708	-4.41214	21.4946	-22.9898	24.5631
35.6428	20.294	23.6356	17.946	24.3694	16.8776	32.6552	14.08	-2.70194	14.461	-15.5739	25.3858	-3.03816	27.9777	-28.642	29.8063	-8.71647	29.0478
4.95383	47.164	-5.85757	52.0437	-15.6899	49.3571	-9.5021	48.6683	-49.9027	48.7853	-45.1849	53.0147	-42.8088	56.449	-44.006	45.5967	-29.0755	51.7674
-6.44439	29.1227	-5.91707	27.7447	-4.19092	25.1543	-9.79435	23.8362	-19.3787	28.4659	-21.0613	34.9145	-15.3678	33.6741	-26.9037	25.8738	-14.437	23.8358
35.7673	23.2084	27.8904	18.177	14.2706	13.6114	21.0235	19.3911	-0.466655	21.4274	-0.850294	23.0586	6.05436	27.6383	-0.555969	28.5428	0.942562	23.3302
9.44639	30.6419	11.3134	22.0046	15.4124	16.4508	16.5022	11.3233	-29.1391	9.98826	-20.6245	11.9508	-5.23271	23.6696	-21.8883	11.1887	-10.7244	12.6394
1.24461	29.8965	-9.45899	32.901	-5.97824	31.7224	-4.0012	28.6351	-13.434	27.9351	-12.8546	29.3718	-19.9101	44.793	-10.8614	26.399	-16.2342	27.0797
2.90547	48.7112	12.1023	38.9525	5.66875	32.8888	10.4482	29.4189	-8.8129	13.9196	-5.13767	13.4103	-3.18851	29.9925	-27.9975	28.2199	-6.61581	21.7414
22.2797	67.0232	12.8439	61.6806	22.2666	53.5997	19.515	54.6997	-3.54147	31.9144	-3.9198	34.4711	2.34842	50.0797	-10.6403	33.4186	7.56909	39.9611
25.7985	55.4069	28.6168	50.39	26.9033	40.7313	15.2484	49.013	-21.4888	27.6978	-19.9015	35.3516	-9.03008	44.6676	-25.3244	34.2159	-15.3785	39.9761
28.5154	54.9542	19.6087	49.518	28.7585	22.6952	19.9574	46.1542	-9.70439	24.2759	-0.0903156	24.3602	7.00856	35.4372	-7.04937	20.9671	13.4582	21.218
13.7692	9.91979	27.9006	-0.590495	30.3188	-1.96016	18.1152	3.9398	26.019	-2.77539	25.0566	-2.57666	42.3015	-4.90679	30.7787	-5.19998	21.8317	0.448365
-4.2772	42.1089	-6.33284	37.2216	0.512856	34.0818	-4.30579	35.345	-23.4127	12.3273	-14.6454	19.3247	-6.53813	29.2501	-14.3067	14.5384	-1.72145	17.8379
12.531	36.0585	-5.72619	42.5114	0.43258	35.4929	2.22173	33.8019	-4.74388	35.639	-8.01631	33.2246	-3.20225	34.1205	-6.65391	27.2148	-7.36963	29.8154
21.708	35.5995	16.5276	32.5457	-2.93237	35.4153	10.9261	30.0508	-2.64238	26.0255	-8.91205	33.5301	-14.6791	42.9526	-11.8893	27.1212	-8.37847	26.2568
9.96818	32.4178	4.65424	32.5065	-5.3414	32.1467	1.8326	31.9548	-15.1436	28.3284	-18.0715	33.1837	-21.9549	41.4649	-2.1595	17.5364	-5.19471	32.4527
4.16296	28.4876	-8.3196	25.0577	-3.67165	22.0491	-10.1422	23.3089	-21.2218	14.7384	-33.0542	21.4971	-22.3282	26.7696	-26.5737	16.0779	-28.2499	20.8215
36.7728	32.3385	23.8876	29.5032	16.8963	30.7469	21.1436	32.1183	-9.62724	34.7704	-8.43248	33.8769	11.0882	32.426	-5.46818	29.1591	-2.33042	33.5724
-39.7964	63.1949	-29.9736	50.8193	-25.3022	48.389	-32.9642	52.0649	-37.0782	31.053	-25.4394	34.5748	-25.84	45.7107	-29.4558	27.3959	-27.7115	36.9946
-6.66526	21.6442	-13.3251	27.5741	-4.98929	25.7819	-10.2564	24.9174	-11.1672	25.2454	-5.10278	26.8955	-7.49626	25.546	-2.62787	17.0562	-5.33734	30.1567
-7.61207	20.835	-10.7949	25.4624	-9.2838	28.3802	-1.4655	22.2439	-11.7982	25.9285	-11.1479	28.7164	-5.25744	32.8872	-8.87151	24.6879	-6.91867	24.4475
33.7682	39.2972	18.554	37.0045	30.0293	25.5242	23.1358	32.1999	-16.5155	10.8577	-8.29328	22.092	-0.652919	32.735	-5.10741	14.4513	-1.23931	23.3366
39.2889	38.4906	30.6891	34.5168	28.1022	33.9717	27.8136	33.3083	-11.5145	13.5275	-9.31762	20.7506	9.97818	27.0119	-12.818	15.5419	5.30225	22.0708
31.5886	29.2767	25.0253	22.7997	26.126	15.7695	25.8547	17.1765	-13.4827	10.0363	-7.41341	15.7087	3.54459	26.9724	-3.54024	11.3816	5.86738	11.2773
15.4856	35.8047	12.4109	25.7391	23.043	16.5641	14.6263	22.0152	11.0793	2.89113	-2.66482	19.6437	1.12503	27.1812	6.28512	12.8582	3.79447	18.1017
62.3759	32.1091	53.7626	31.7486	62.1959	23.6186	56.474	32.3227	18.7922	21.4408	13.9219	19.9866	32.8084	31.4729	6.15391	26.4794	32.2735	24.5781
64.477	32.8622	66.496	28.7283	63.5106	20.7047	63.5143	33.1015	19.4328	4.66475	14.0294	15.8347	28.303	25.3734	-5.58723	19.7505	28.3054	24.832

## Sheet: Figure 2a
Wild-type
Infected		Non-infected
TP1	TP2	TP1	TP2
15.0323	86.1402	31.2966	31.3084
16.9682	41.4368	23.7527	61.0828
36.0048	69.7644	28.6424	99.6297
26.0812	27.7656	50.4375	96.8092
53.8427	48.2187	64.1488	91.9967
28.2573	-1.23575	20.4888	84.4254
17.6571	97.4065	56.3967	5.15768
14.7665	76.8486	69.9513	96.6327
35.7131	33.5575	26.3007	27.6741
23.9404	69.7716	58.5355	80.3481
27.6031	76.9883	24.0539	47.5601
31.1372	83.4152	31.7006	56.4265
60.2877	92.7816	23.6595	-4.49867
42.4546	96.1529	20.294	55.9368
40.0961	44.6128	47.164	52.1178
28.1093	58.7448	29.1227	22.6783
16.3032	46.4227	23.2084	58.9757
14.4658	33.0018	30.6419	40.0883
24.638	25.9273	29.8965	31.1411
55.8797	78.0786	48.7112	51.6166
30.7404	41.3495	67.0232	89.3028
38.745	21.9967	55.4069	81.2054
56.2763	18.881	54.9542	83.4696
14.601	82.1504	9.91979	23.689
20.4976	33.648	42.1089	37.8317
46.0753	58.4191	36.0585	48.5895
57.5552	69.4938	35.5995	57.3075
31.5214	53.5699	32.4178	42.386
35.3279	53.1117	28.4876	32.6505
13.6552	29.7362	32.3385	69.1113
52.0888	69.2107	63.1949	23.3986
10.8218	78.6493	21.6442	14.9789
32.5398	27.9424	20.835	13.2229
10.5171	68.7932	39.2972	73.0654
34.4233	79.5476	38.4906	77.7795
26.0338	62.7235	29.2767	60.8653
24.394	38.1896	35.8047	51.2903
2.23868	24.5703	32.1091	94.485
48.5449	59.3345	32.8622	97.3392
37.482	78.1209
27.3963	82.0238
24.5371	46.5016
29.267	39.3083
40.2063	31.4661
36.3477	36.7416
19.2785	48.3622
35.0732	34.509
26.6432	32.765
32.1125	61.8306
25.2187	33.8868
59.4549	6.66944
26.2925	24.3636
40.2124	62.8734
46.0001	31.8958
60.379	61.0459
28.9294	50.1549
21.3499	40.5898
24.1739	64.8052
30.4765	42.2299
36.4569	72.759
33.5169	70.9931
31.7975	93.4764
57.7493	97.6561
22.2	32.3268
58.5154	56.1175
21.9793	5.93209
9.1058	25.4461
19.6722	35.2972

## Sheet: Figure 2b
Alpha (B.1.1.7)
high WT TP2				low/medium WT TP2
Infected		Non-infected		Infected		Non-infected
TP1	TP2	TP1	TP2	TP1	TP2	TP1	TP2
15.965	72.1064	29.335	99.23	21.8813	37.4993	24.4724	31.778
33.0504	59.9369	43.3708	93.5984	23.8267	21.7231	23.2114	56.1386
17.458	93.2155	52.6343	82.7856	46.9167	40.7618	50.1911	8.7965
20.4206	63.9686	18.4237	72.6508	26.3702	3.2702	21.5958	19.6052
19.3567	59.7537	59.3426	94.6177	32.7268	25.2661	23.6969	33.0741
22.0864	62.7054	50.7275	72.0583	30.8095	43.0874	23.7088	49.0246
28.4723	70.8385	61.6806	74.5245	25.1018	45.1189	21.2596	-3.70585
50.6951	83.5843	50.39	79.0068	21.8492	34.4673	17.946	41.5816
36.2637	92.7567	49.518	69.1268	16.0284	26.2437	52.0437	46.1861
51.2758	62.4451	29.5032	53.3908	19.0203	26.3247	27.7447	21.8276
12.7884	69.4056	37.0045	55.5585	25.6368	31.4508	18.177	46.0674
45.9816	56.9732	34.5168	65.2059	35.5738	16.5801	22.0046	33.318
44.8049	49.4249	31.7486	85.5112	49.763	18.359	32.901	23.442
15.7521	68.5809	28.7283	95.2242	18.8502	29.1835	38.9525	51.0548
13.7842	55.6616			42.6306	43.6488	-0.590495	27.3101
26.849	73.2151			24.5577	42.9035	37.2216	30.8887
34.0856	61.5615			28.704	43.3038	42.5114	36.7852
19.6569	69.3444			12.2059	21.2041	32.5457	49.0733
32.732	62.8939			25.6802	25.9305	32.5065	37.1608
37.0853	62.3959			23.4942	45.6196	25.0577	16.7381
31.0113	89.3178			25.0732	30.4078	50.8193	20.8457
45.3658	94.047			0.0146376	21.7465	27.5741	14.249
				44.6497	53.4095	25.4624	14.6675
				22.5525	41.6541	22.7997	47.825
				25.314	38.2819	25.7391	38.1499
				33.1779	23.4722
				30.1748	33.7804
				17.1299	41.8656
				29.8135	30.7604
				28.5223	28.5987
				37.0473	48.2501
				20.8499	32.5615
				51.7733	3.23426
				25.9131	30.4721
				32.3012	47.8922
				44.7001	23.1133
				53.8893	57.8485
				21.5679	48.4862
				20.2551	35.5162
				19.0709	58.82
				26.6641	38.6661
				23.8776	27.6597
				50.8859	46.0599
				25.6608	10.1713
				17.6826	21.6923
				12.1789	29.4625

## Sheet: Figure 2c
Beta (B.1.351; B.1.351.1)
high WT TP2				low/medium WT TP2
Infected		Non-infected		Infected		Non-infected
TP1	TP2	TP1	TP2	TP1	TP2	TP1	TP2
10.141	70.8203	26.5437	98.7429	16.6442	34.2286	26.2891	30.7896
29.2551	38.009	36.2332	87.5349	17.4953	22.082	14.196	48.9624
10.1368	87.9712	44.8494	60.7321	39.1042	37.4911	50.7179	6.98043
17.0524	54.1577	12.1737	53.5971	27.3662	3.452	13.2849	18.5335
17.529	49.5774	45.3093	78.6471	26.1014	19.8003	22.235	31.7242
16.9179	50.4958	42.0747	53.4536	25.4065	31.6048	11.2677	49.3795
22.9678	57.7352	53.5997	75.8663	24.3012	42.168	22.4429	5.27674
40.5523	80.5622	40.7313	67.6347	23.8662	32.3744	16.8776	41.247
23.9621	75.2472	22.6952	51.4536	9.97235	22.8149	49.3571	33.6672
51.9636	59.772	30.7469	47.6433	22.5771	25.5833	25.1543	20.9633
15.7051	71.9445	25.5242	55.5536	24.3735	34.3248	13.6114	27.882
33.9704	49.3454	33.9717	62.0739	32.1969	20.2813	16.4508	31.8632
27.9616	36.5923	23.6186	85.8145	48.4468	18.1234	31.7224	25.7442
13.9193	60.0716	20.7047	84.2152	8.86957	32.5938	32.8888	38.5576
12.9876	46.9068			33.8611	38.1116	-1.96016	28.3587
26.7209	53.1659			23.472	30.3959	34.0818	34.5946
39.8254	64.621			26.6562	40.2207	35.4929	35.9255
19.7061	50.9882			10.0461	23.6504	35.4153	32.4829
24.3742	54.265			25.8054	23.4869	32.1467	26.8053
28.1287	52.1057			18.2047	46.6002	22.0491	18.3774
28.8599	79.8037			28.7024	28.7137	48.389	23.0868
43.3556	84.1038			1.20853	17.1694	25.7819	20.7926
				44.428	51.1147	28.3802	19.0964
				26.0181	45.3891	15.7695	41.8955
				19.3451	37.5175	16.5641	39.6071
				31.4044	29.7483
				30.2377	38.9378
				13.7467	33.1976
				23.1598	27.2338
				21.7847	19.8012
				26.9357	42.3312
				16.707	29.9299
				48.6402	3.55842
				25.0256	27.6792
				30.919	45.7191
				29.8083	30.9177
				39.6994	49.2967
				30.2227	36.3846
				33.0039	19.6886
				15.8541	38.4625
				26.1613	38.3259
				17.7708	28.918
				48.0249	32.2657
				23.7505	10.0888
				14.0519	32.1306
				16.2419	19.8759

## Sheet: Figure 2d
Delta (variants)
high WT TP2				low/medium WT TP2
Infected		Non-infected		Infected		Non-infected
TP1	TP2	TP1	TP2	TP1	TP2	TP1	TP2
14.5748	70.818	26.0909	99.4905	21.8943	36.0585	20.8568	29.0009
25.7313	48.4918	40.4063	93.0509	23.3359	18.5371	24.4888	49.4452
17.9043	90.9835	53.3149	77.7208	40.4444	30.3348	49.2593	4.66035
21.9635	56.2623	16.624	65.1368	22.9228	-2.53407	23.4467	19.5804
17.1548	53.4103	51.7661	90.204	29.1456	23.5224	25.3261	18.7063
23.8569	61.4455	41.7591	61.7124	30.4071	31.0066	20.8611	42.6081
20.0288	67.4083	54.6997	74.2147	25.547	42.5748	18.3299	10.7384
44.7902	82.472	49.013	64.2614	25.4236	37.1162	14.08	46.7353
30.5657	84.6024	46.1542	66.1116	14.493	21.4489	48.6683	39.1662
48.991	56.8242	32.1183	53.2619	10.7456	27.5105	23.8362	14.0418
3.0724	67.7358	32.1999	55.3357	18.7826	31.2427	19.3911	40.4146
44.769	55.4262	33.3083	61.1219	21.4093	20.6896	11.3233	27.8255
26.7264	39.5111	32.3227	88.7967	49.0504	17.9489	28.6351	24.6339
18.9245	65.3255	33.1015	96.6158	17.2631	28.0676	29.4189	39.8671
13.6651	68.0064			33.6312	37.7814	3.9398	22.055
17.461	66.1963			21.6411	34.6201	35.345	31.0392
24.6641	62.7354			29.3738	41.2174	33.8019	36.0236
23.4524	55.9411			13.3124	21.4732	30.0508	40.9769
31.3326	53.7544			19.4985	18.8307	31.9548	33.7874
31.5348	54.2473			12.4842	47.8649	23.3089	13.1667
23.6452	83.024			7.68077	32.2906	52.0649	19.1007
50.713	95.8327			2.05139	25.4886	24.9174	14.661
				40.7518	47.8147	22.2439	20.7784
				13.8394	46.0904	17.1765	43.0312
				30.0112	38.0231	22.0152	36.6415
				26.435	27.7536
				33.1264	26.7643
				14.6354	32.64
				26.5668	28.4159
				23.1658	24.7135
				29.1735	40.4636
				17.3444	27.4676
				41.3873	3.20573
				21.7675	23.7495
				29.7571	43.2481
				44.0317	23.6865
				43.3465	50.6101
				26.3952	38.153
				18.6287	29.0064
				10.2045	55.9536
				23.555	31.3025
				22.5945	27.1951
				49.2467	39.3345
				12.1148	1.22018
				14.5077	18.0761
				7.73228	20.2914

## Sheet: Figure 2e
Omicron (B.1.1.529; BA.1; BA.1.15)
high WT TP2				low/medium WT TP2
Infected		Non-infected		Infected		Non-infected
TP1	TP2	TP1	TP2	TP1	TP2	TP1	TP2
6.84109	25.5718	25.1504	72.769	9.75089	26.3929	25.5774	22.299
25.6254	27.5746	19.3444	22.7004	14.2609	-2.74555	20.5179	27.4249
12.8847	55.0346	21.5421	24.6465	18.8617	-8.17462	54.9368	-11.4506
9.23614	13.2991	10.8444	23.5079	28.2712	-12.8432	13.6102	14.8913
15.9092	6.50155	10.703	37.0757	25.236	11.9428	19.3178	-1.81414
18.9124	22.0517	19.4031	-12.4723	17.9255	16.8101	3.68592	24.1021
22.0862	23.966	31.9144	28.373	15.7792	-9.05091	23.7164	19.8688
23.4891	20.8315	27.6978	6.20896	20.9319	3.45849	14.461	11.759
22.5183	35.5198	24.2759	14.5715	25.4974	-0.965082	48.7853	-1.11739
51.0615	11.378	34.7704	25.1432	20.3144	17.7019	28.4659	9.0872
10.8231	31.4599	10.8577	-5.65781	24.764	18.1211	21.4274	20.9608
23.9238	20.5911	13.5275	2.01295	19.2858	12.3147	9.98826	-19.1508
28.0632	-8.17768	21.4408	40.2329	47.9517	8.38408	27.9351	14.5012
8.90809	42.5782	4.66475	24.0976	-9.21214	11.4007	13.9196	5.10666
16.8427	20.0354			13.3915	11.1625	-2.77539	23.2436
25.3481	3.35444			23.5078	8.79461	12.3273	-11.0854
40.7265	16.8147			12.7194	4.80046	35.639	30.8951
16.7971	37.4318			14.845	13.9115	26.0255	23.3831
15.1784	8.561			19.6511	5.76214	28.3284	13.1848
7.84926	22.3874			15.5118	9.65876	14.7384	-6.4834
22.8357	27.5678			16.8084	11.9701	31.053	-6.02524
21.1853	9.05677			1.74847	7.07532	25.2454	14.0783
				48.1384	8.95565	25.9285	14.1303
				33.3793	46.2203	10.0363	-3.4464
				16.1841	21.572	2.89113	13.9704
				22.8223	23.3831
				27.1047	24.4017
				19.9099	15.2454
				15.3598	14.9525
				9.26548	12.1083
				8.42001	5.37203
				19.7872	11.1693
				28.4205	-16.6672
				15.5438	29.2371
				16.5867	17.1367
				22.2222	17.6516
				29.066	26.632
				21.3753	-2.2461
				20.6989	4.43983
				5.79559	16.969
				34.6642	30.4097
				11.3245	11.6524
				31.8184	-5.96401
				17.1227	2.45296
				16.3063	7.53223
				19.5605	-13.5236

## Sheet: Figure 2f
Omicron (BA.2 subvariants)
high WT TP2				low/medium WT TP2
Infected		Non-infected		Infected		Non-infected
TP1	TP2	TP1	TP2	TP1	TP2	TP1	TP2
17.9322	29.4449	33.765	80.4503	18.5016	24.0867	27.8166	23.2376
28.6604	17.5026	26.1084	38.8792	31.348	-0.255042	20.5911	30.3425
17.6786	54.7236	26.9729	29.7158	29.5791	7.18481	54.5096	-7.23881
14.8314	20.9581	18.7154	22.6473	28.3893	-6.38968	18.0885	11.4693
19.6277	11.4905	18.1268	34.0493	28.3637	8.83566	16.8587	6.37763
19.9451	26.2678	28.9938	9.27406	27.4562	9.89367	13.2061	24.7966
32.4343	25.2234	34.4711	30.5513	22.8313	8.34374	25.355	8.47615
19.0822	31.5791	35.3516	15.4501	19.4796	16.2218	25.3858	9.81193
27.2249	37.078	24.3602	24.2699	21.1829	18.0263	53.0147	7.82988
52.6705	20.9278	33.8769	25.4444	21.6218	18.6083	34.9145	13.8533
18.9642	29.4752	22.092	13.7988	23.8673	18.1625	23.0586	22.2083
26.8979	20.0439	20.7506	11.433	22.6344	16.5702	11.9508	-8.6737
26.3269	0.990653	19.9866	33.9085	52.2095	13.5672	29.3718	16.5172
16.2446	46.706	15.8347	29.8642	-1.09978	13.3462	13.4103	8.2726
21.3041	29.398			19.4267	13.5445	-2.57666	22.4799
25.0349	17.0269			23.3043	11.7705	19.3247	4.67931
31.1519	18.8179			21.9644	17.4541	33.2246	25.2083
15.33	39.6239			13.3305	13.263	33.5301	24.618
17.3755	6.51228			21.2786	16.8472	33.1837	15.1122
11.6701	25.6412			11.0209	18.3063	21.4971	-11.5571
25.8181	37.9226			18.5794	22.0154	34.5748	9.13535
26.7138	37.1432			5.09676	20.2992	26.8955	21.7927
				37.3246	22.841	28.7164	17.5685
				24.8772	49.0649	15.7087	8.2953
				20.0308	24.1624	19.6437	16.9788
				25.1115	14.159
				28.7657	37.3357
				21.4859	20.2306
				22.4206	14.6252
				20.9277	11.1242
				20.0568	13.2539
				18.9036	16.1327
				32.9255	-12.9981
				20.5385	25.6881
				24.0428	14.2801
				23.601	14.7523
				31.5857	32.7468
				24.1239	4.11111
				17.6178	3.82866
				6.00132	25.3261
				29.8104	27.9328
				18.2624	19.2265
				30.3352	6.36395
				18.5144	8.23173
				15.7079	12.9964
				12.2698	-3.31252

[truncated: 19 more sheets: Figure 2g, Figure 2h, Figure 2i, Figure 3a, Figure 3b, Figure 3c, Figure 3d, Figure 4a, Figure 4b, Figure 4c, Figure 4d, Figure 4e, Figure 4f, Figure 4g, Figure 4h, Figure 5a, Figure 5b, Figure 5c, Figure 5d]
